# Supplementary material
Source: PubMed Central journal article supplement (PMC2797879)

Supplemental Fig. 1

A Hep3B

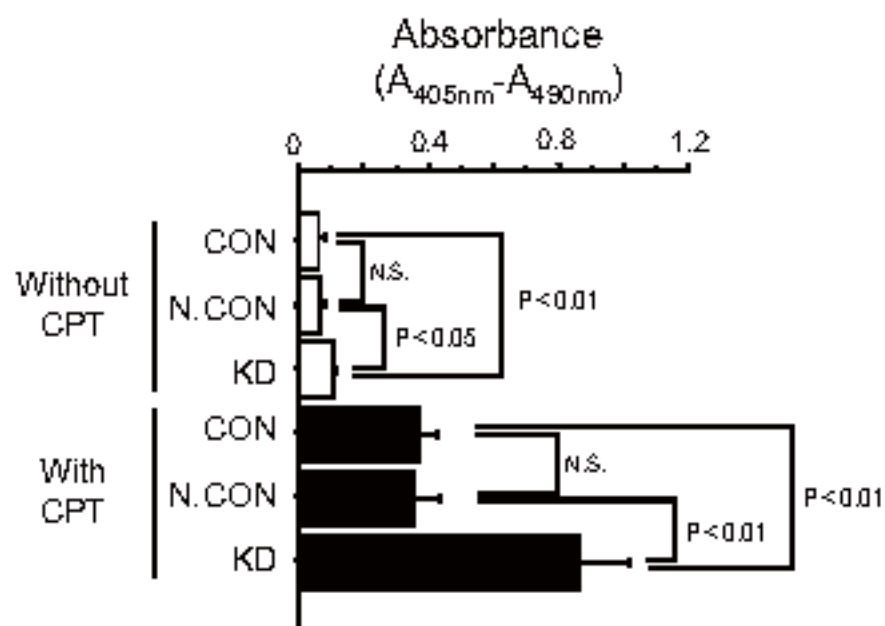

B Huh-7

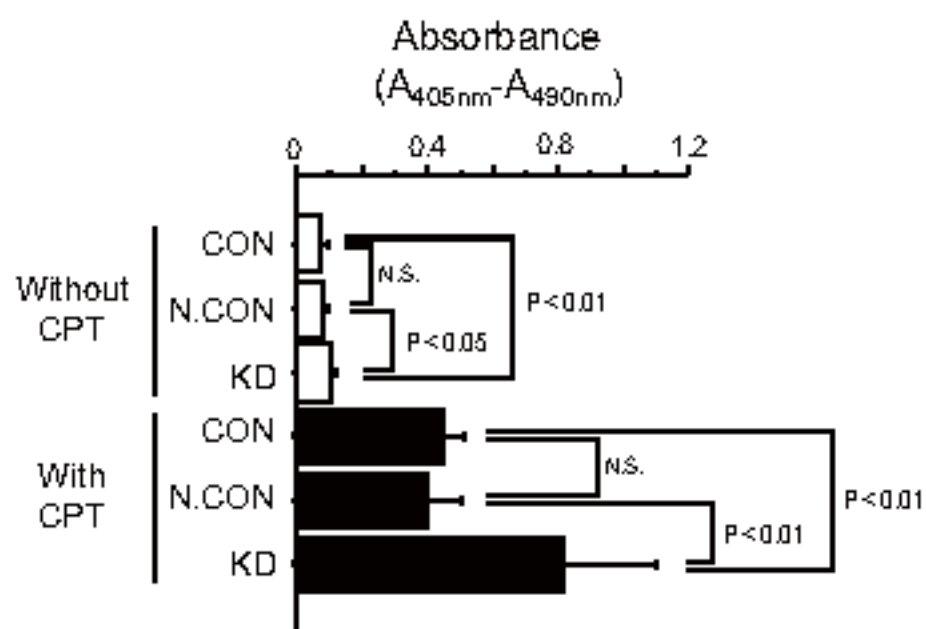

Supplement: mmc1.pdf [file mmc1.pdf]

Supplemental Fig. 2

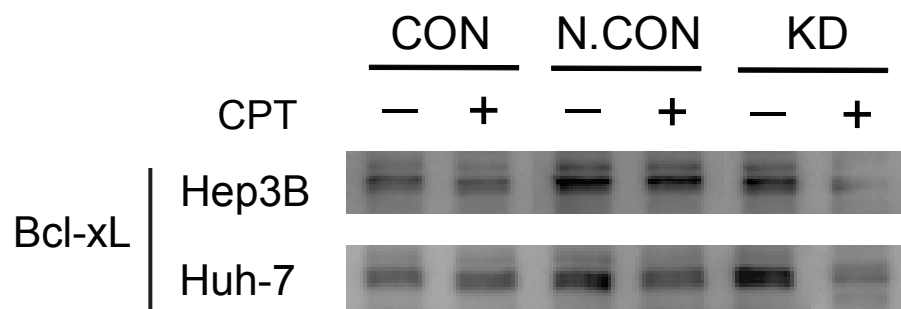

Supplement: mmc2.pdf [file mmc2.pdf]
